# Supplementary material
Source: HighWire-hosted journal article supplement (https://genome.cshlp.org/content/suppl/2004/08/09/12.3.414)
Supplement: supplemental_-_table_11.pdf [file supplemental_-_table_11.pdf]

Genomic Microsatellites as Evolutionary Chronometers: A Test in Wild Cats  
C. Driscoll, et al.

Table 2

***Estimates of microsatellite mutation rate***

| Estimated average rate                        | umber of microsatellite<br>loci on which<br>estimate was based | Method of estimation                                                                                                  | Citation              |
|-----------------------------------------------|----------------------------------------------------------------|-----------------------------------------------------------------------------------------------------------------------|-----------------------|
| $3 \times 10^{-4}$ to $4 \times 10^{-3}$      | 3 di                                                           | Linkage disequilibrium with presumed founder mutation                                                                 | Hastabacka, 1992      |
| $1.2 \times 10^{-4}$ and $4.7 \times 10^{-4}$ | 2 di                                                           | Nine series of recombinant inbred mouse strains and parental inbred strains analysed for non-parental length variants | Dallas, 1993          |
| $2.3 \times 10^{-5}$ to $15.9 \times 10^{-5}$ | 5 tri and tetra                                                | Indirectly using maximum likelihood method                                                                            | Edwards et al. , 1992 |
| $5.6 \times 10^{-4}$                          | 15 di                                                          | Mutation events counted as seen in large-scale genotyping of CEPH families                                            | Weber and Wong, 1993  |
| $2 \times 10^{-3}$                            | 3 tetra and penta                                              | mutations observed in 3 generation porcine pedigree                                                                   | Ellegren, 1995        |
| $6 \times 10^{-5}$                            | 42 di                                                          | mutations observed in 3 generation porcine pedigree                                                                   | Ellegren, 1995        |
| $2.1 \times 10^{-3}$                          | 9                                                              | 4 mutations in 1917 germ line transmission of Y-STRs in multi generation human pedigree                               | Heyer et al. 1997     |
| $5.7 \times 10^{-4}$                          | 7                                                              | 0 mutations of 1743 human meiosis in father-son paris for Y-STRs                                                      | Bianchi et al. 1998   |
| $3.19 \times 10^{-3}$                         | 1                                                              | 2 mutations in 626 human meiosis in father-son pairs for Y-STRs                                                       | Kayser et al. 1997    |
| $2.80 \times 10^{-3}$                         | 15                                                             | 14 mutations in 4999 meiosis in father-son paris using Y-STRs                                                         | Kayser et al. 2000    |
| $2.1 \times 10^{-3}$                          |                                                                |                                                                                                                       | Brinkmann et al. 1998 |
| $2.7 \times 10^{-3}$                          |                                                                |                                                                                                                       | Henke and Henke, 1999 |
| $0.6 \times 10^{-3}$                          |                                                                |                                                                                                                       | Sajantila et al. 1999 |
